# Supplementary material for: Hysteresis phenomenon in a reaction system of nanocrystalline iron and a mixture of ammonia and hydrogen
Source: Royal Society of Chemistry journal article supplement (doi:10.1039/c6cp04606a), 2016-01-01
Supplement: c6cp04606a1.pdf [file c6cp04606a1.pdf]

## Electronic Supporting Information A

### Hysteresis phenomenon in the reaction system of nanocrystalline iron with mixture of ammonia and hydrogen

Walerian Arabczyk, Ewa A. Ekiert, Rafał Pelka\*

*West Pomeranian University of Technology, Szczecin, Institute of Chemical and Environment  
Engineering, 10 Pułaskiego Str., 70-322 Szczecin, Poland*

\* *Corresponding author: tel. +48 91 449 47 30, fax +48 91 449 46 86, e-mail: rpelka@zut.edu.pl*

#### List of symbols used in the text

| Symbol                | Unit               | Definition                                                                                       |
|-----------------------|--------------------|--------------------------------------------------------------------------------------------------|
| $\alpha$              |                    | solid solution of $\alpha$ -Fe with nitrogen, sublattice of Fe <i>bcc</i>                        |
| $\gamma$              |                    | solid solution of $\gamma$ -Fe with nitrogen, sublattice of Fe <i>fcc</i>                        |
| $\gamma'$             |                    | $\gamma'$ -Fe <sub>4</sub> N <sub>1-x</sub> , sublattice of Fe <i>fcc</i>                        |
| $\mu$                 | kJ                 | chemical potential                                                                               |
| $N_g$                 |                    | nitrogen in a gas phase                                                                          |
| $N_s$                 |                    | nitrogen on a surface of solid phase                                                             |
| $N_b$                 |                    | nitrogen in a bulk of solid phase                                                                |
| $x$                   |                    | mole fraction                                                                                    |
| $\theta$              |                    | surface coverage degree                                                                          |
| $\Delta H_a$          | kJ/mol             | enthalpy of adsorption of nitrogen molecules on the surface of iron                              |
| $\Delta H_{cb}$       | kJ/mol             | enthalpy of formation of the bond between the surface iron atom and nitrogen, Fe <sub>s</sub> -N |
| $\Delta G$            | kJ/mol             | Gibbs energy                                                                                     |
| $\Delta G_{seg}$      | kJ/mol             | Gibbs energy of segregation                                                                      |
| $E_s$                 | kJ/mol             | Surface energy of nanocrystallite                                                                |
| Fe <sub>s</sub> -     |                    | unoccupied surface iron atom , free adsorption site for nitrogen molecule                        |
| Fe <sub>s</sub> -N    |                    | surface iron atom bonded with nitrogen                                                           |
| $\Gamma$              | J/m <sup>2</sup>   | density of the surface energy                                                                    |
| P                     | Pa <sup>-0.5</sup> | nitriding potential                                                                              |
| superscript<br>n or r |                    | as appropriate for nitriding <sup>n</sup> or reduction <sup>r</sup> process                      |

## Electronic Supporting Information A

| <b>Symbol</b>                                                    | <b>Unit</b> | <b>Definition</b>                                                                                            |
|------------------------------------------------------------------|-------------|--------------------------------------------------------------------------------------------------------------|
| superscript<br>or subscript<br>$\alpha$ or $\gamma$ or $\gamma'$ |             | designation of $\alpha$ -Fe $\alpha$ , $\gamma$ -Fe $\gamma$ , $\gamma'$ -Fe <sub>4</sub> N $\gamma'$ phases |
| subscript 0<br>or max                                            |             | as appropriate for the minimum and maximum of nitriding potential at which phase exist                       |
| square<br>bracket [ ]                                            |             | transition state                                                                                             |
