# Supplementary material for: Hysteresis phenomenon in a reaction system of nanocrystalline iron and a mixture of ammonia and hydrogen
Source: Royal Society of Chemistry journal article supplement (doi:10.1039/c6cp04606a), 2016-01-01
Supplement: c6cp04606a2.pdf [file c6cp04606a2.pdf]

## Electronic Supporting Information B

### Hysteresis phenomenon in the reaction system of nanocrystalline iron with mixture of ammonia and hydrogen

Walerian Arabczyk, Ewa A. Ekiert, Rafał Pelka\*

*West Pomeranian University of Technology, Szczecin, Institute of Chemical and Environment  
Engineering, 10 Pułaskiego Str., 70-322 Szczecin, Poland*

\* *Corresponding author: tel. +48 91 449 47 30, fax +48 91 449 46 86, e-mail: rpelka@zut.edu.pl*

#### **Thermodynamics of the process of gaseous ammonia nitriding of nanocrystalline iron**

In the process of nitriding with gas mixtures containing ammonia there on the surface of  $\alpha$ -Fe nanocrystallite the disassociative adsorption of  $\text{NH}_3$  molecules takes place:

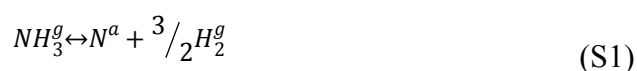

The equilibrium constant of dissociation reaction,  $K$ , of an ammonia molecule for the above reaction can be expressed as:

$$K = \frac{p_{\text{N}} \cdot p_{\text{H}_2}^{3/2}}{p_{\text{NH}_3}} \quad (\text{S2})$$

Substituting the expression for the nitriding potential, we obtain:

$$p_{\text{N}} = K \cdot P \quad (\text{S3})$$

where:  $p_{\text{N}}$  – hypothetical nitrogen partial pressure.

Atomic nitrogen species adsorbed at the nanocrystallite surface diffuse into its bulk and creates solid state solution with iron,  $\alpha$ -Fe(N). At steady state for the Fe-NH<sub>3</sub>-H<sub>2</sub> system, between nitrogen atoms in the gas phase and adsorbed on the surface of iron nanocrystallite and dissolved in its volume the chemical equilibrium is established. Chemical potentials of nitrogen ( $\mu_{\text{N}}$ ) present in the system in different states are equal to each other. Apart from that, chemical potential of nitrogen in a gas phase equals  $p_{\text{N}}$ :

$$\mu_{\text{N}_g} = p_{\text{N}} \quad (\text{S4})$$

Assuming that the activity coefficient in dilute solutions is close to unity,  $\gamma = 1$ :

$$\mu_{\text{N}_b} = \gamma \cdot x_{\text{N}_b}^\alpha = x_{\text{N}_b}^\alpha \quad (\text{S5})$$

$$x_{\text{N}_b}^\alpha = p_{\text{N}} = K \cdot P \quad (\text{S6})$$

If the equivalent concentrations of nitrogen: in the gas-phase and adsorbed on the surface meet the assumptions for the Langmuir's equation then nanocrystallite is in the chemical equilibrium:

$$\frac{\theta_N^\alpha}{1 - \theta_N^\alpha} = p_N \cdot \exp \frac{-\Delta G_{ads}}{RT} \quad (S7)$$

where:  $\Delta G_{ads}$  – Gibbs energy of nitrogen molecule adsorption process;  $R$  – gas constant;  $\theta_N^\alpha$  – surface coverage degree defined as ratio of the concentration of surface iron atoms covered with nitrogen,  $x_{Fe-N}^\alpha$ , to the sum of the concentrations of surface iron atoms covered with nitrogen and free adsorption sites  $x_{Fe-N}^\alpha + x_{Fe-}^\alpha$ :

$$\theta_N^\alpha = \frac{x_{Fe-N}^\alpha}{x_{Fe-N}^\alpha + x_{Fe-}^\alpha} \quad (S8)$$

Concentration of nitrogen dissolved in a volume of iron crystallite,  $x_{N_b}^\alpha$ , and adsorbed on nanocrystallite surface,  $x_{N_s}^\alpha$ , are connected with each other in accordance with the McLean-Langmuir equation:

$$\frac{\theta_N^\alpha}{1 - \theta_N^\alpha} = \frac{x_{N_b}^\alpha}{1 - x_{N_b}^\alpha} \cdot \exp \frac{-\Delta G_{seg}^\alpha}{RT} \quad (S9)$$

where  $\Delta G_{seg}^\alpha$ , it is Gibbs energy of the nitrogen segregation process in  $\alpha$  phase.

With an increase in chemical potential of nitrogen in the gas phase the iron nanocrystallite surface coverage degree,  $\theta_N^\alpha$ , increases as well as nitrogen concentration in nanocrystallite volume,  $x_{N_b}^\alpha$ , in accordance with the McLean-Langmuir equation, up to the maximum critical levels,  $\theta_{N_{max}}^\alpha$  and  $x_{N_{bmax}}^\alpha$ , respectively.

For dilute solutions, i.e. solution of nitrogen in  $\alpha$ -iron, where  $n_N \ll n_{Fe}$  and  $n_{Fe} = 1$  (number of moles of iron), number of moles of nitrogen is equal to nitrogen molar fraction according to the equation:

$$x_N^\alpha = \frac{n_N}{n_{Fe} + n_N} \approx n_N \quad (S10)$$
